# Supplementary material for: A distinct isoform of ZNF207 controls self-renewal and pluripotency of human embryonic stem cells
Source: PubMed Central journal article supplement (PMC6197280; doi:10.1038/s41467-018-06908-5), 2018-10-22
Supplement: 41467_2018_6908_MOESM1_ESM.pdf [file 41467_2018_6908_MOESM1_ESM.pdf]

**A distinct isoform of ZNF207 controls self-renewal and pluripotency  
of human embryonic stem cells**

Fang et al.,

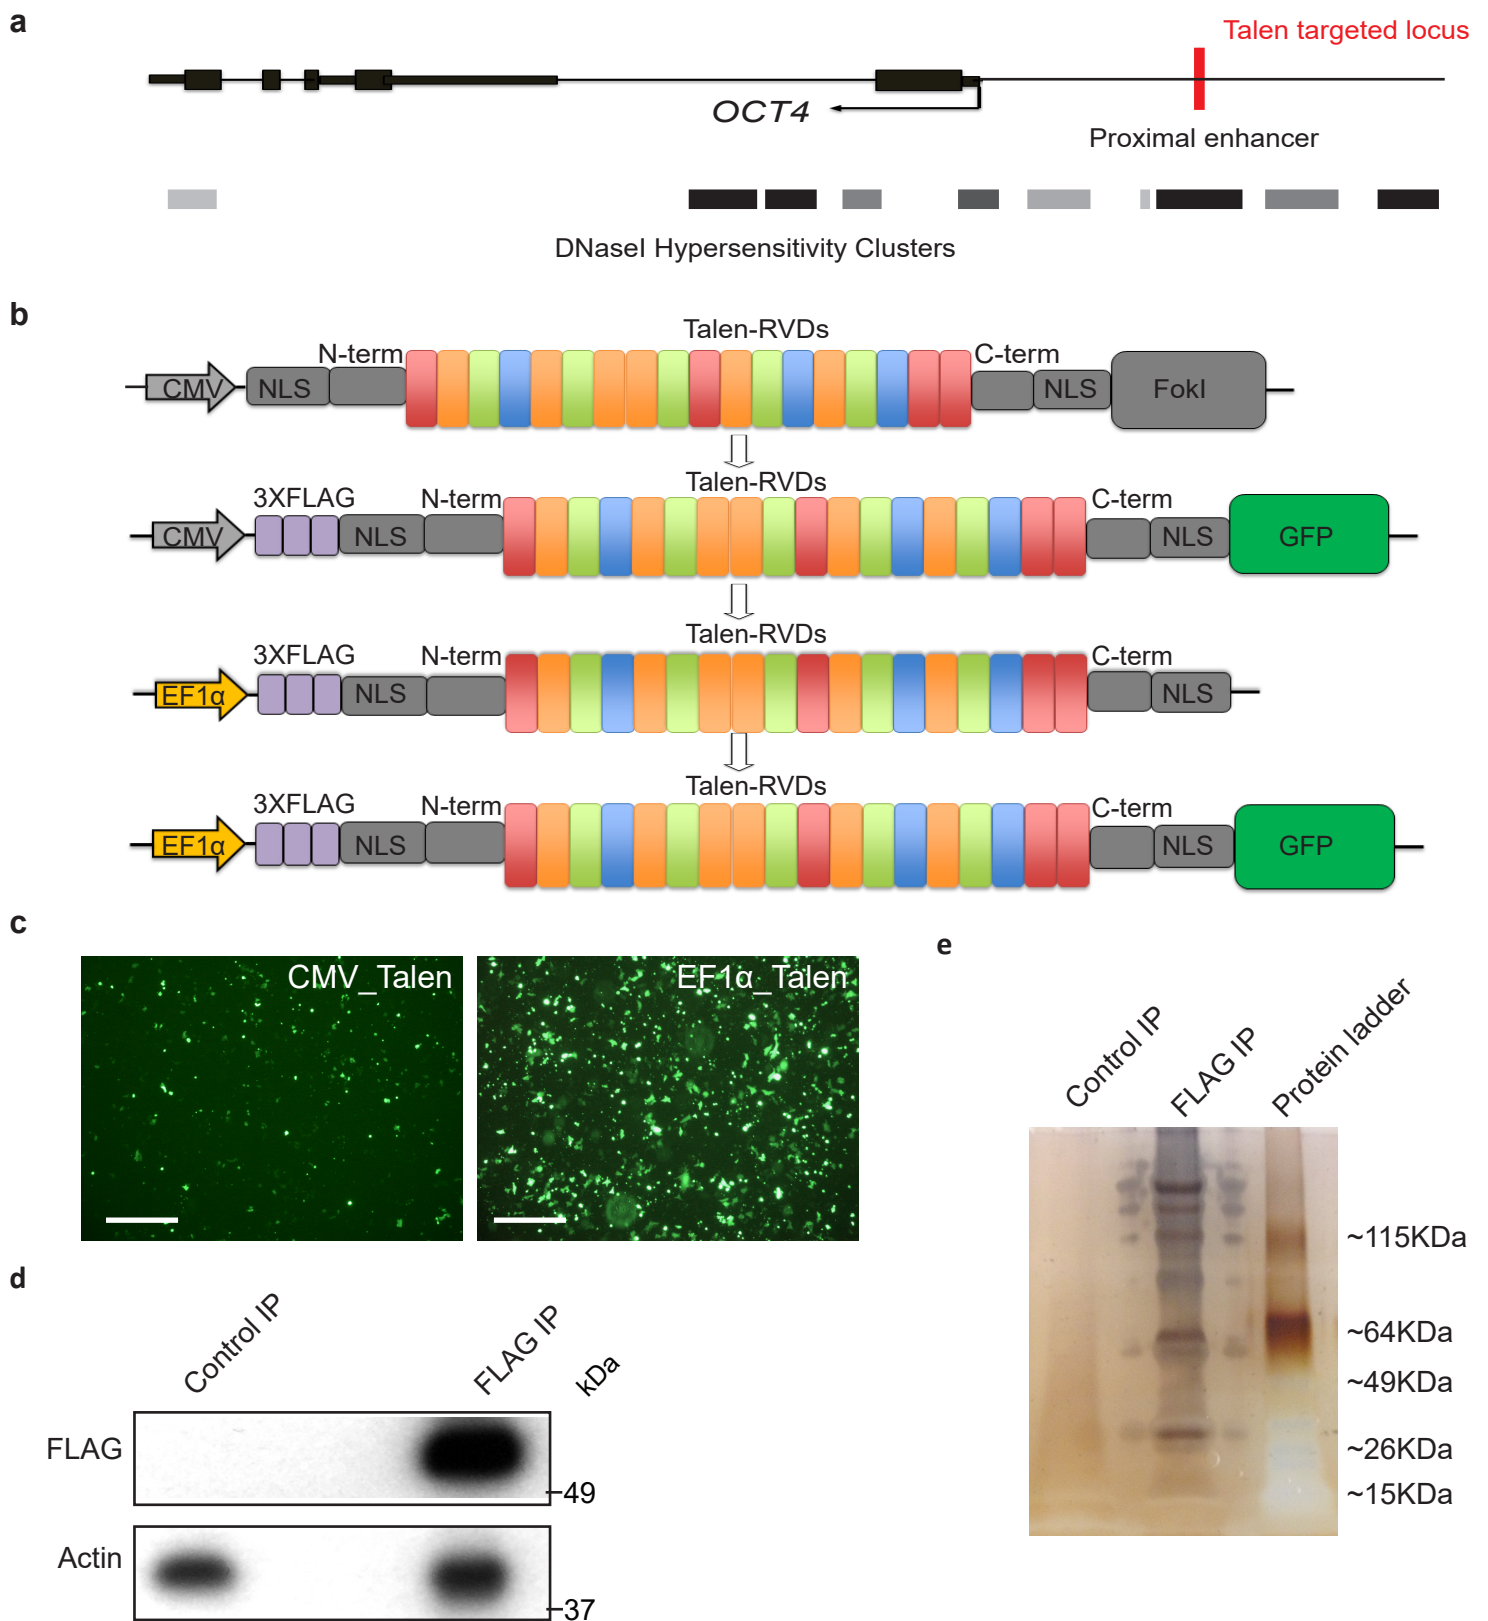

**Supplementary Figure 1.** Optimization of TALEN protein expression to target OCT4 locus for locus-specific proteomics in hESCs. **(a)** Schematic representation of the human OCT4 locus. Dark boxes represent exons and the red bar represents the locus targeted by TALEN protein. The extent of DNaseI hypersensitivity are indicated by gray boxes. The darkness is proportional to the maximum signal strength observed. **(b)** Schematic representation of dTALE protein designed for locus-specific proteomics in hESCs. **(c)** A comparison of transfection efficiency of CMV and EF1 $\alpha$  promoter-driven dTALE protein in hESCs. GFP-positive cells were shown. Scale bars represent 100 $\mu$ m. **(d)** Co-immunoprecipitation using nuclear extract of hESCs was performed using anti-FLAG antibody. Western blot was performed with anti-FLAG and anti-Actin antibody. Control IP was performed using an anti-green fluorescent protein (GFP) antibody. **(e)** Silver staining of the nuclear extracts of hESCs after FLAG immunoprecipitation.

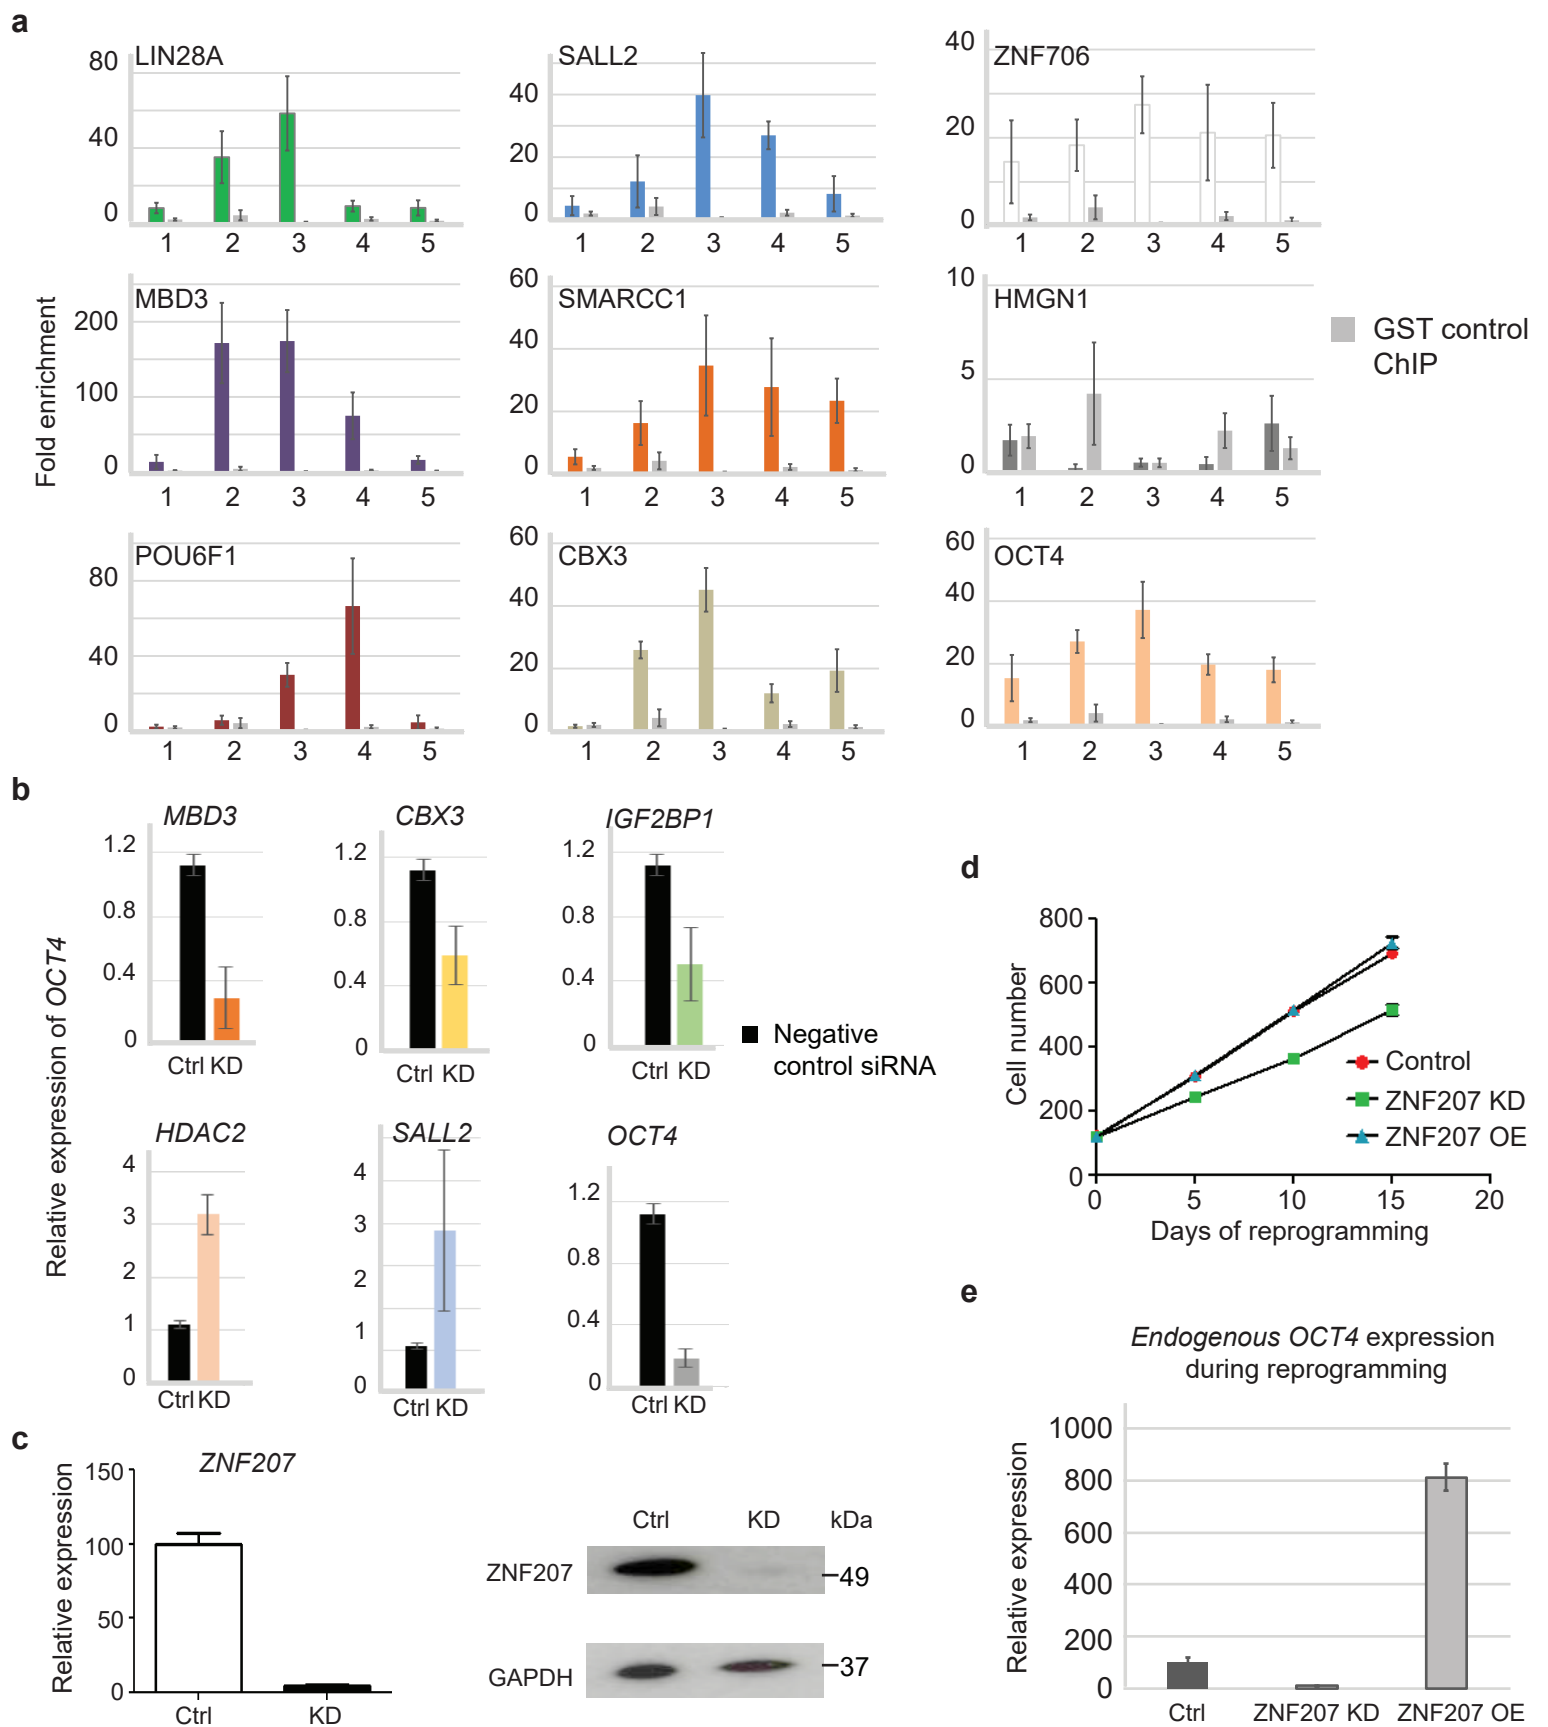

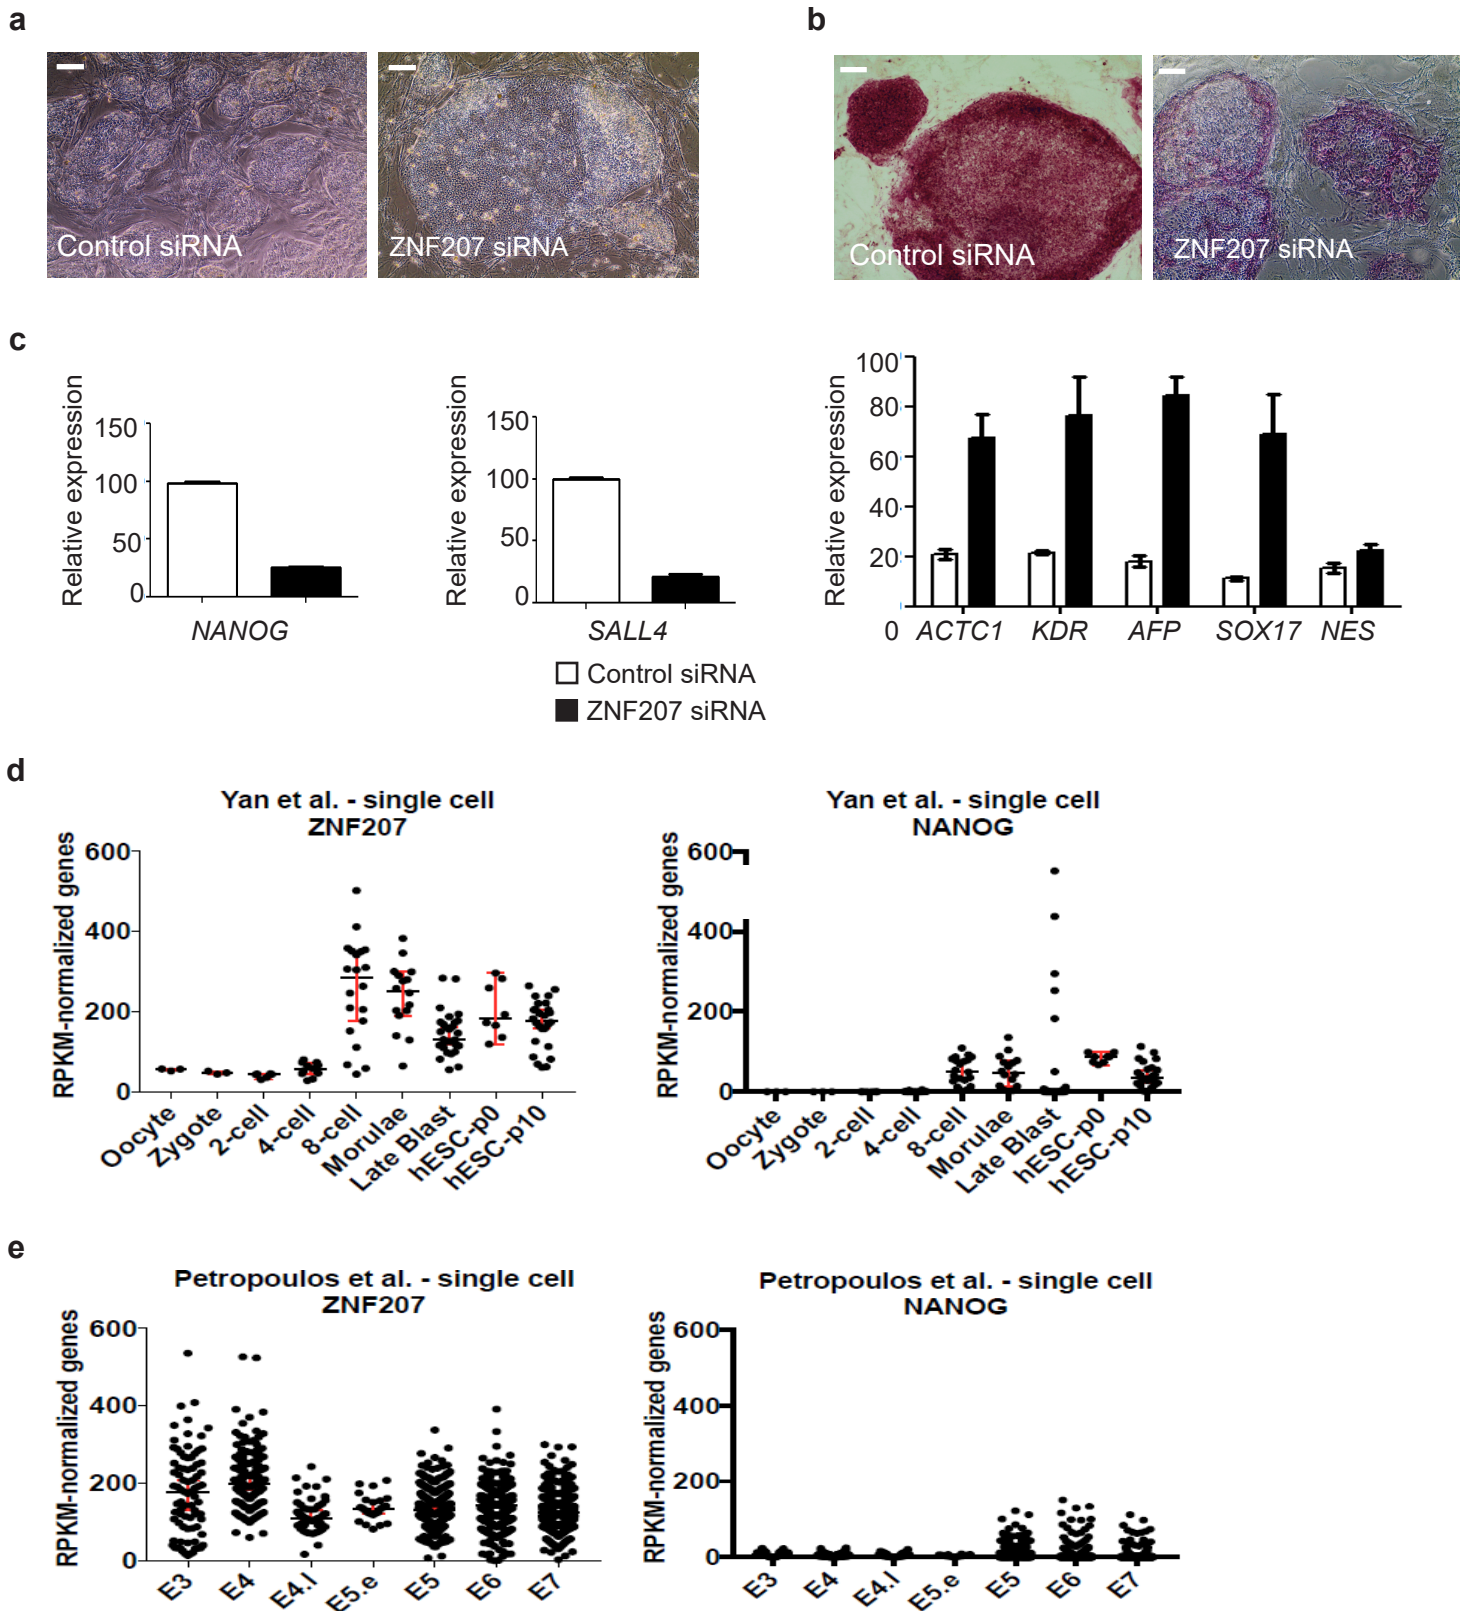

**Supplementary Figure 3.** Functional analysis of ZNF27 in primed and naïve pluripotent stem cells and its expression analysis during early human embryo development. **(a)** Bright field view of cell morphology after knockdown. Scale bars represent 50  $\mu$ m. **(b)** Alkaline phosphatase staining of cells after knockdown. Scale bars represent 50  $\mu$ m. **(c)** qPCR analysis of the expression of pluripotency and lineage marker genes in different conditions. Data are presented as the mean  $\pm$ SEM and are derived from three independent experiments for qPCR analysis **(d)** The expression of ZNF27 (a) and NANOG (b) during early human embryo development based on single cell RNA-seq data generated in Yan et al., **(e)** The expression of ZNF27 and NANOG during early human embryo development based on single cell RNA-seq data generated in Petropoulos et al.,.

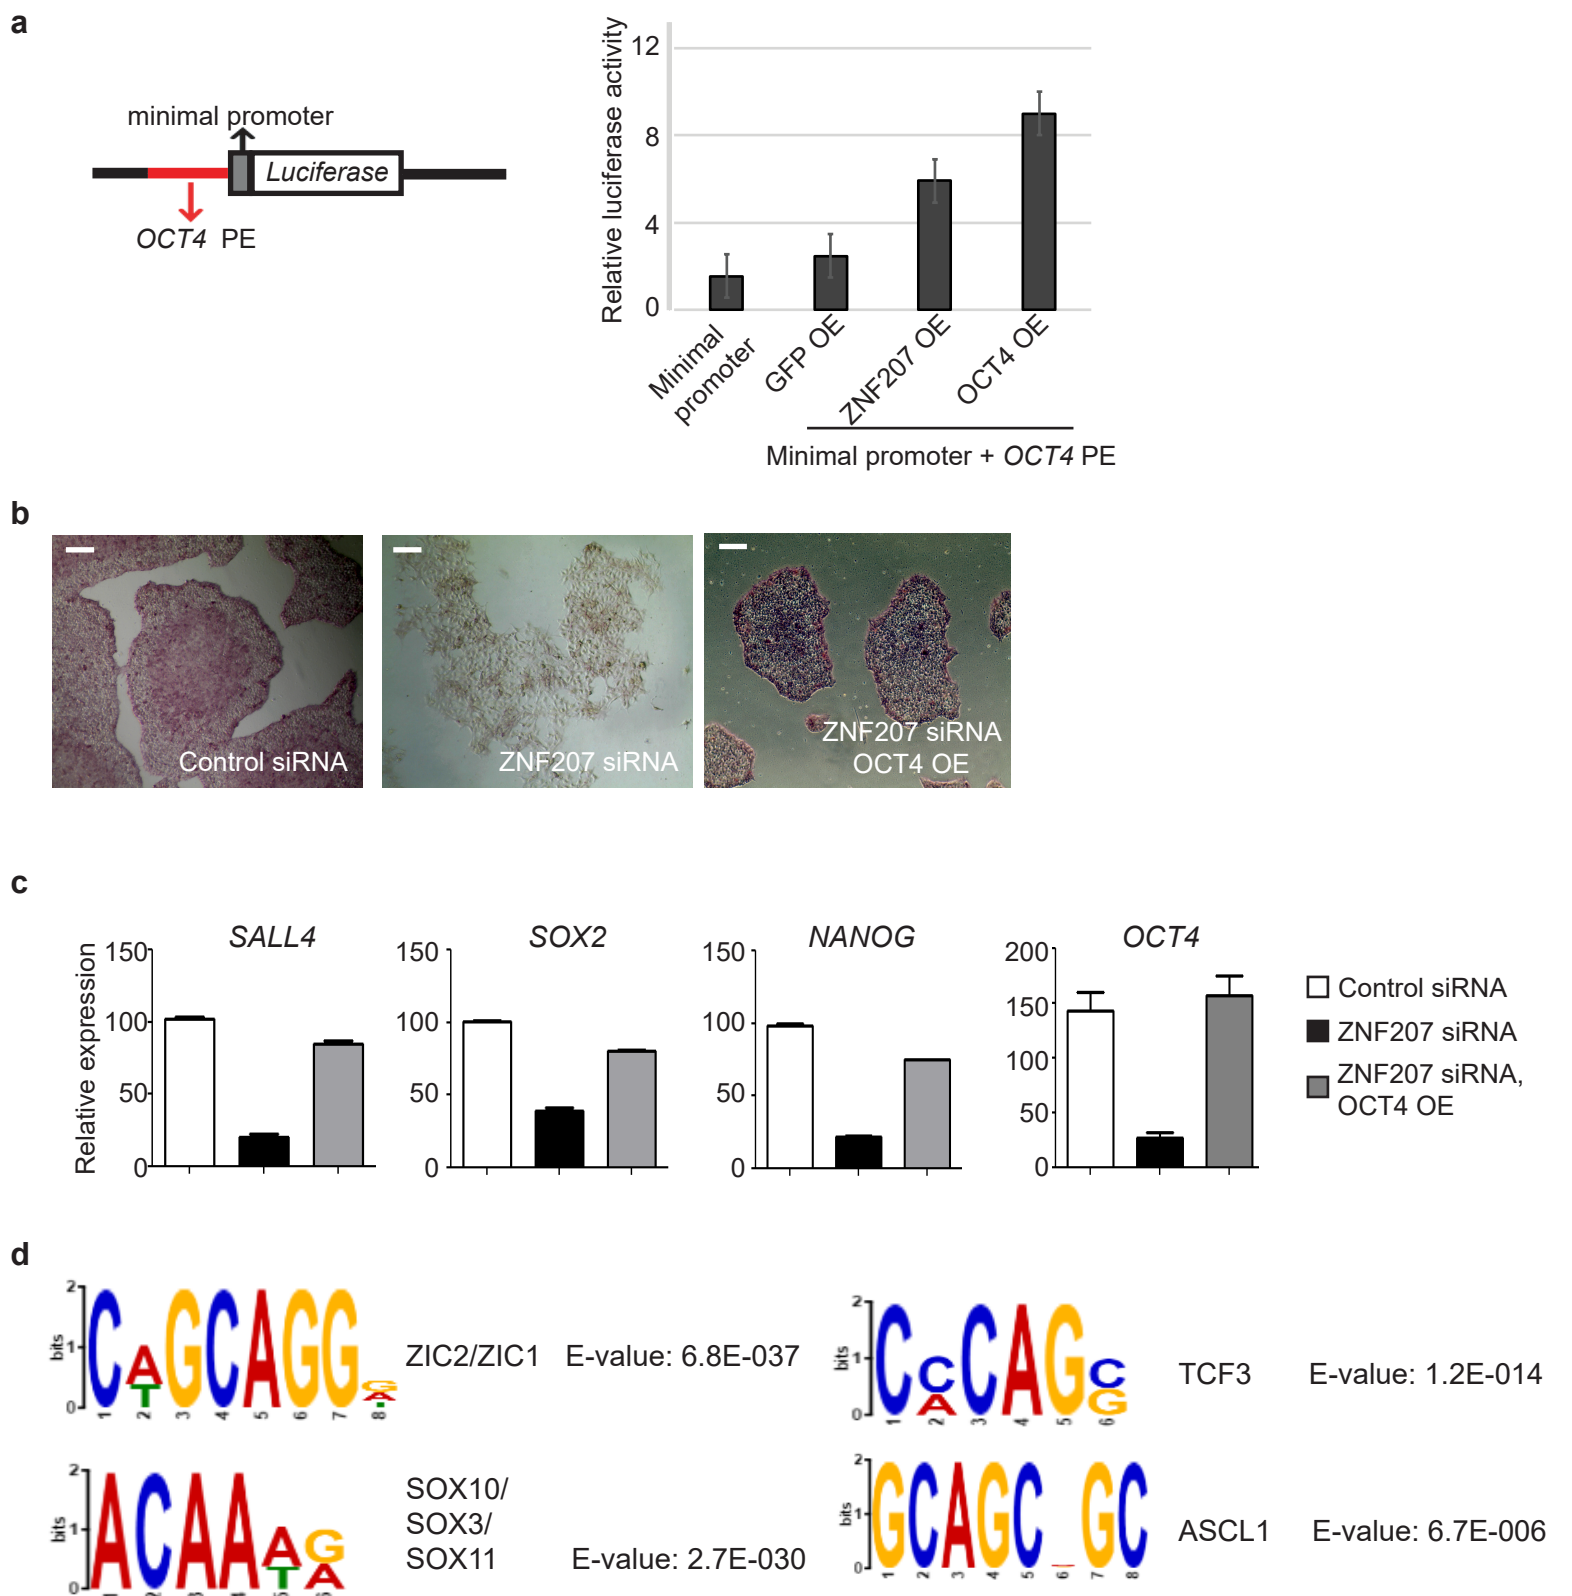

**Supplementary Figure 4.** Identification of direct targets of ZNF207 in hESCs. **(a)** enhancer activity is shown. Genomic fragment bound by ZNF207 (in red) was inserted upstream of a luciferase gene driven by minimal promoter. Y-axis represents the fold enrichment of luciferase activity, calculated relative to a luciferase reporter containing the minimal promoter only and normalized over an internal transfection control. **(b)** Alkaline phosphatase staining of cells after knockdown. Scale bars represent 50  $\mu$ m. **(c)** qPCR analysis of the expression of pluripotency marker genes in different conditions. **(d)** Enriched motifs from de novo motif search of sequences under ZNF207 peaks. The identification of consensus binding motifs for neuronal transcription factors. Statistical significance (E-values) is indicated below the motif logo. Data are presented as the mean  $\pm$  SEM and are derived from three independent experiments for qPCR analysis.

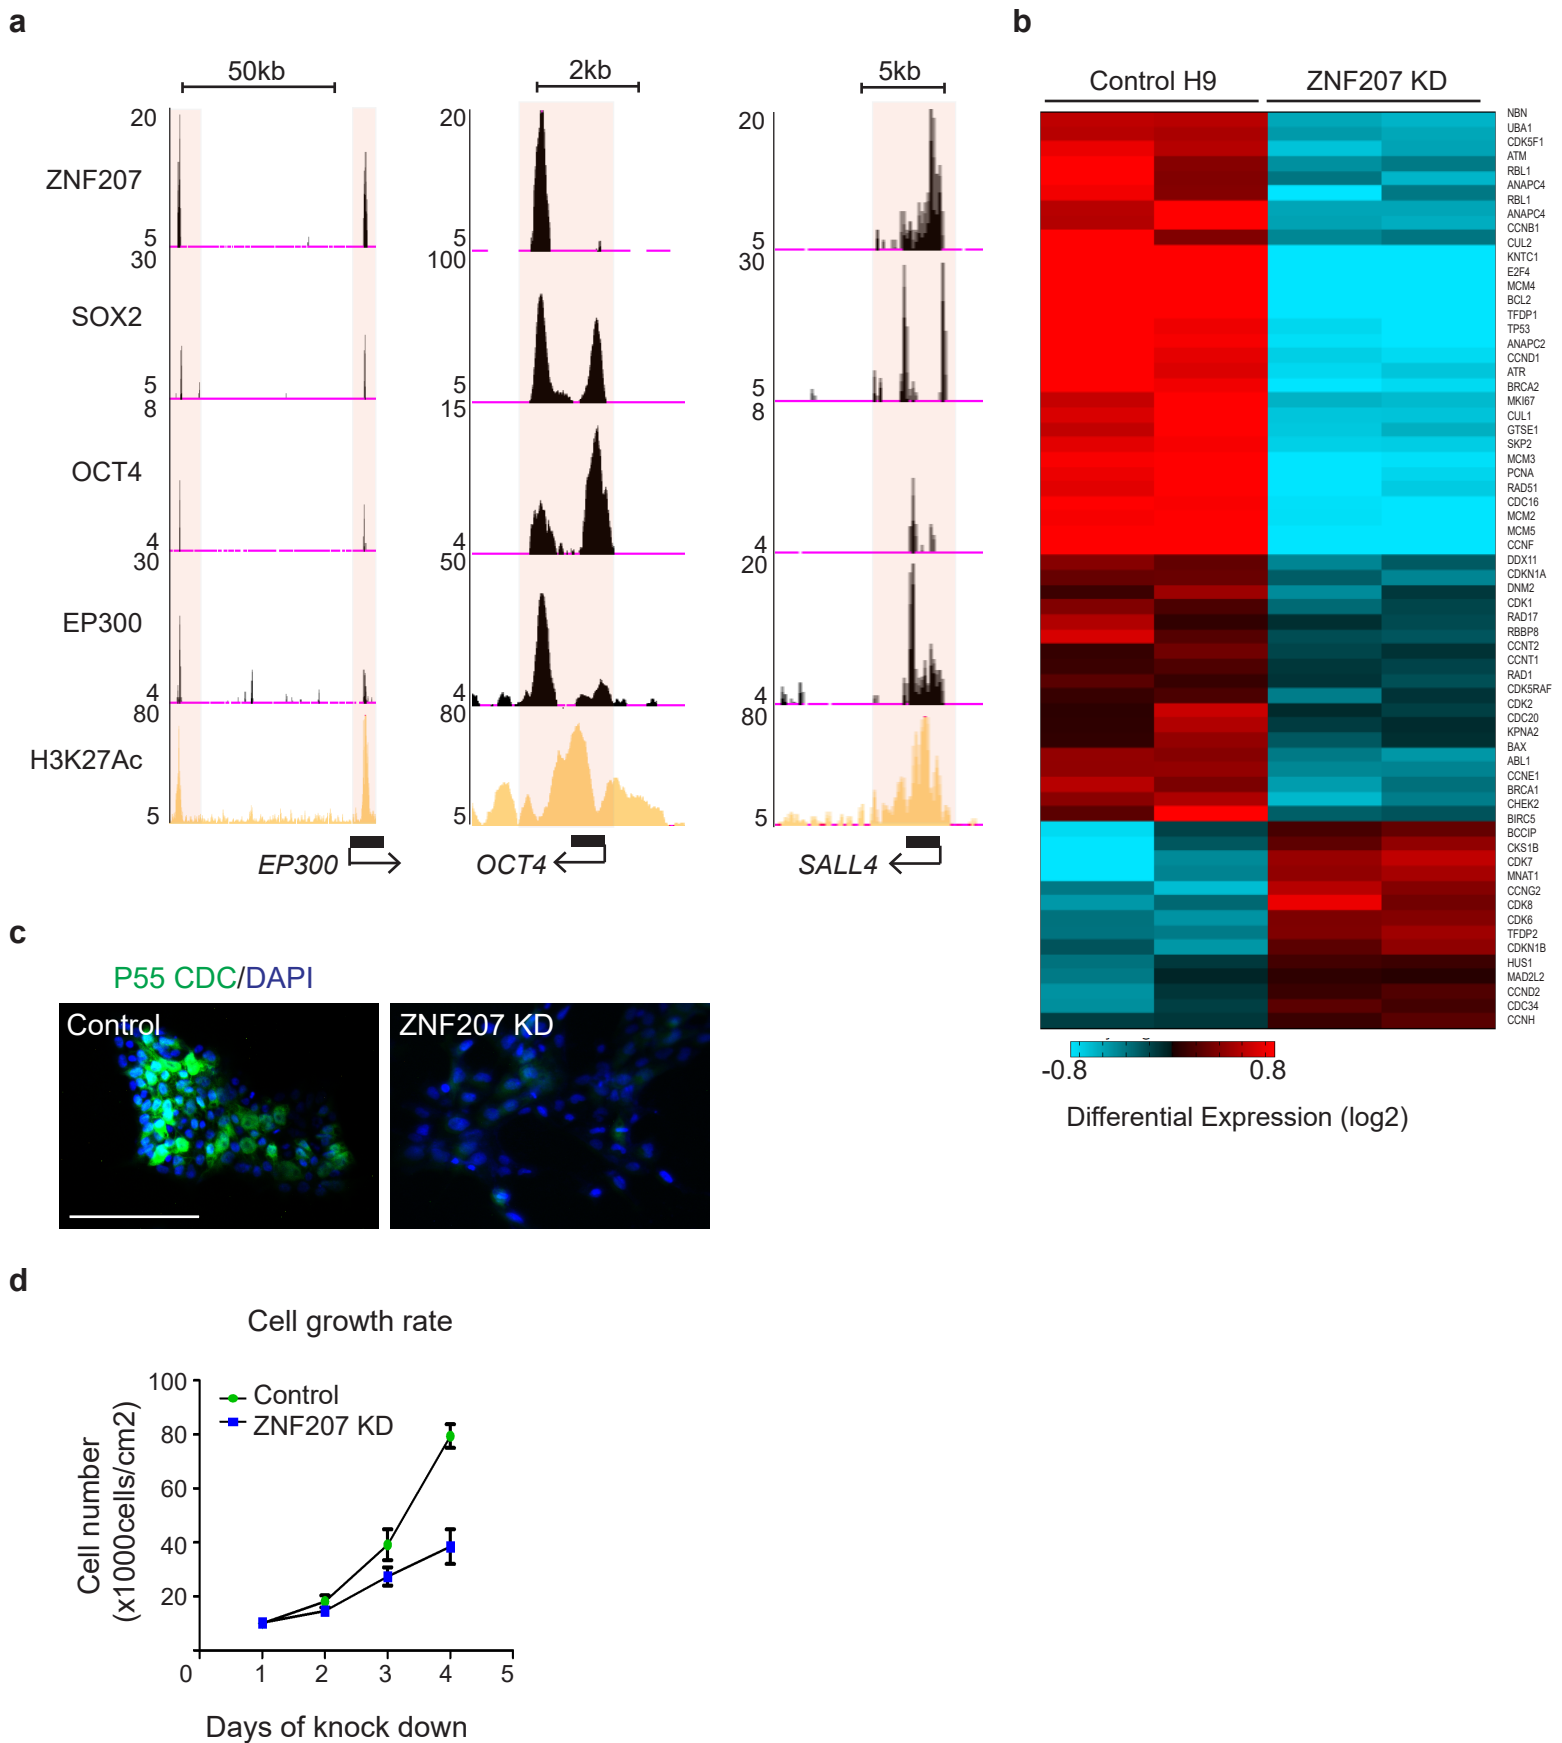

**Supplementary Figure 5.** ZNF207 promotes self-renewal of hESCs. **(a)** ChIP-Seq tracks show co-localization of ZNF207, SOX2, OCT4, P300 and H3K27Ac at the regulatory sequences of pluripotency genes. The scale bars indicate the size of the chromosome. The light pink boxes highlight the co-bound regions. **(b)** Heatmap showing differentially expressed cell cycle genes between control and ZNF207 KD cells; data represent our biological replicates of the same cell lines. **(c)** Immunofluorescence staining of control and ZNF207 KD hESCs for cell cycle proteins. **(d)** Comparison of cell number between ZNF207 KD and control hESCs. Data are presented as the mean  $\pm$  SEM and are derived from three independent experiments.

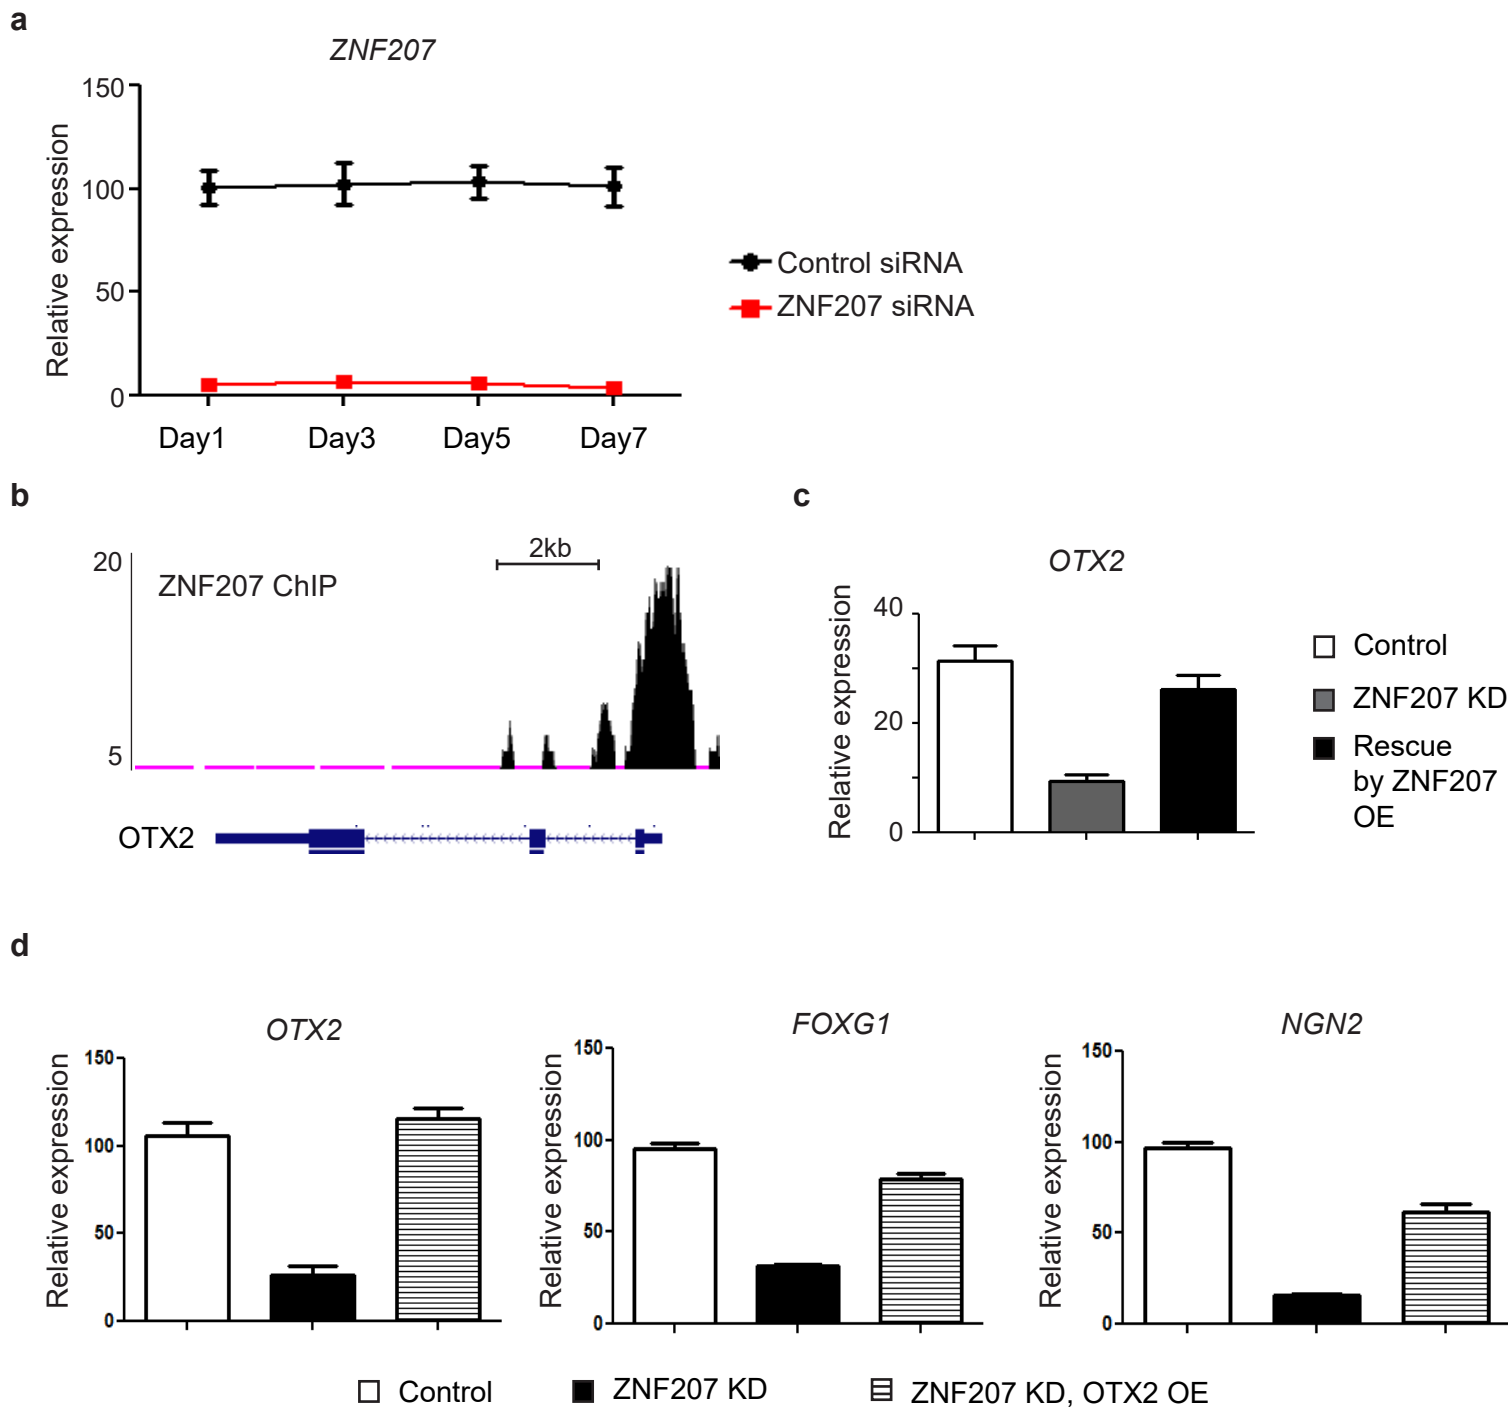

**Supplementary Figure 6.** ZNF207 works upstream of OTX2 to control ectoderm specification. **(a)** The expression of ZNF207 in control and ZNF207 KD cells during 7 days of differentiation. Data are presented as the mean  $\pm$ SEM and are derived from three independent experiments. **(b)** ChIP-Seq tracks show binding of ZNF207 at the regulatory sequences of OTX2 gene. The scale bar indicates the size of the chromosome. **(c)** qPCR to test the expression level of OTX2 in control, ZNF207 KD and rescue by ZNF207 OE cells in the process of ectoderm differentiation. **(d)** The expression of OTX2, FOXG1 and NGN2 in different conditions. Data are presented as the mean  $\pm$ SEM and are derived from three independent experiments.

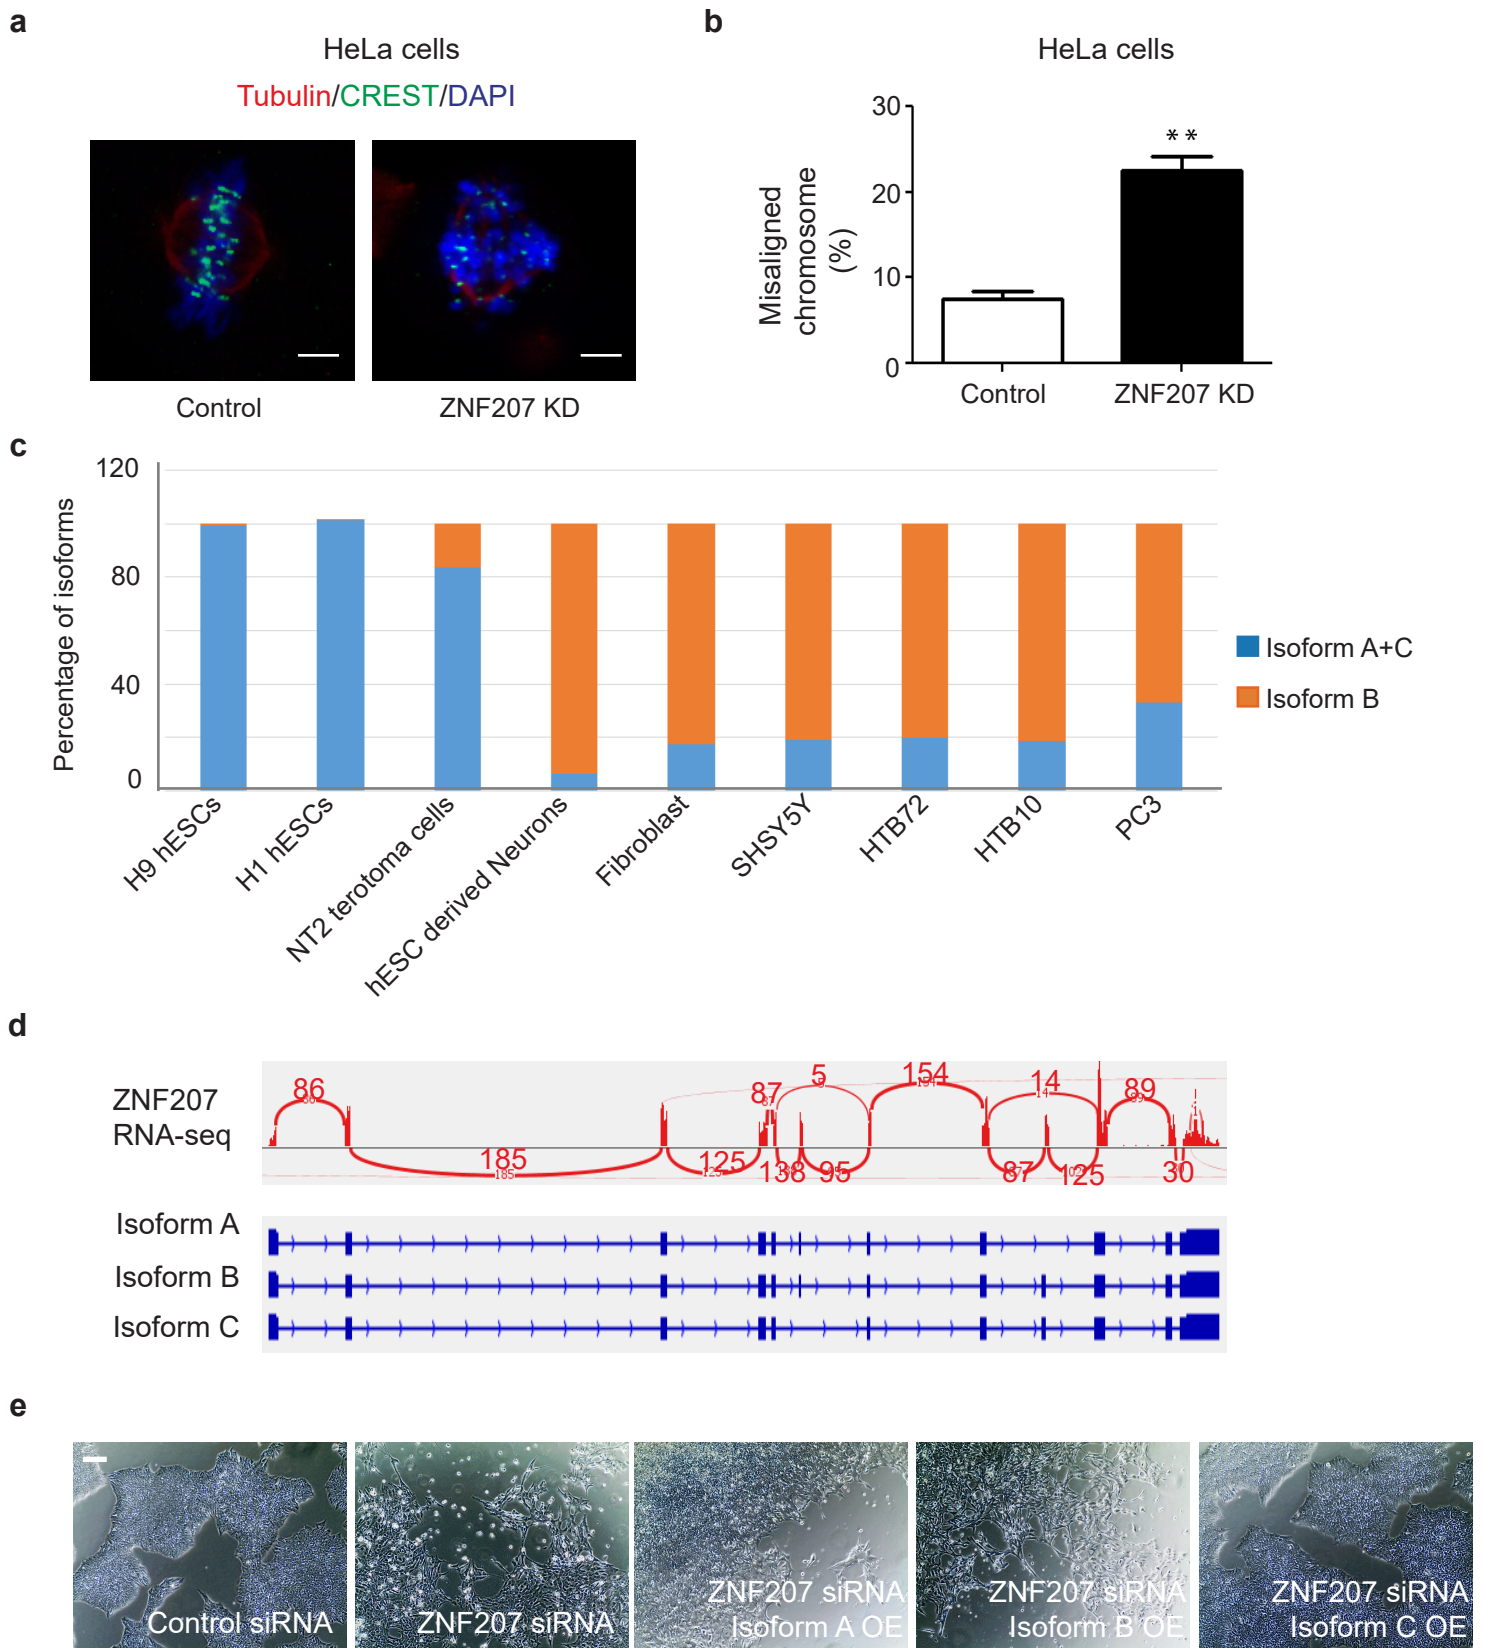

**Supplementary Figure 7.** Different isoforms are present in a variety of cell types and Isoform C is the major one that functions in HeLa cells. **(a)** Confocal images of mitotic cells with aligned chromosomes. ~100 mitotic cells were measured for each experiment and condition. Centromeres were detected by the CREST serum. Scale bar, 5 $\mu$ m. **(b)** Counts of mitotic cells with misaligned chromosomes in control and ZNF207 KD HeLa cells. \*\*,  $p \leq 0.01$ . P-value was calculated by two-tailed Student's t-test. **(c)** RT-qPCR analysis to check the expression of isoforms in a variety of cell types. **(d)** Sashimi plot of ZNF207 gene in hESCs from RNA-seq data. The frequency of exon skipping is indicated by the numbers. **(e)** Bright field view of cells in different conditions. Scale bar, 50 $\mu$ m.



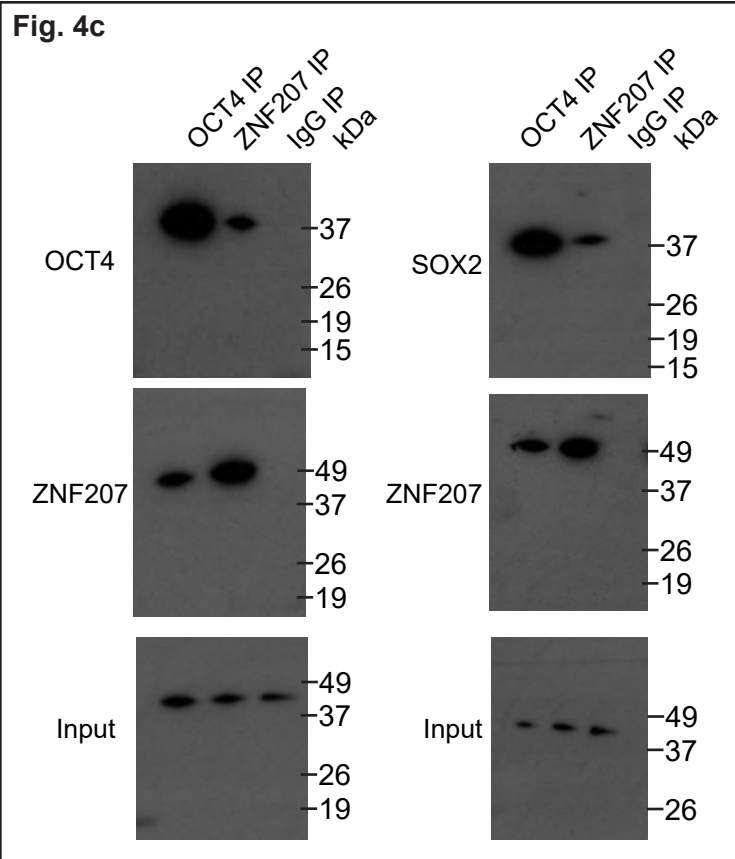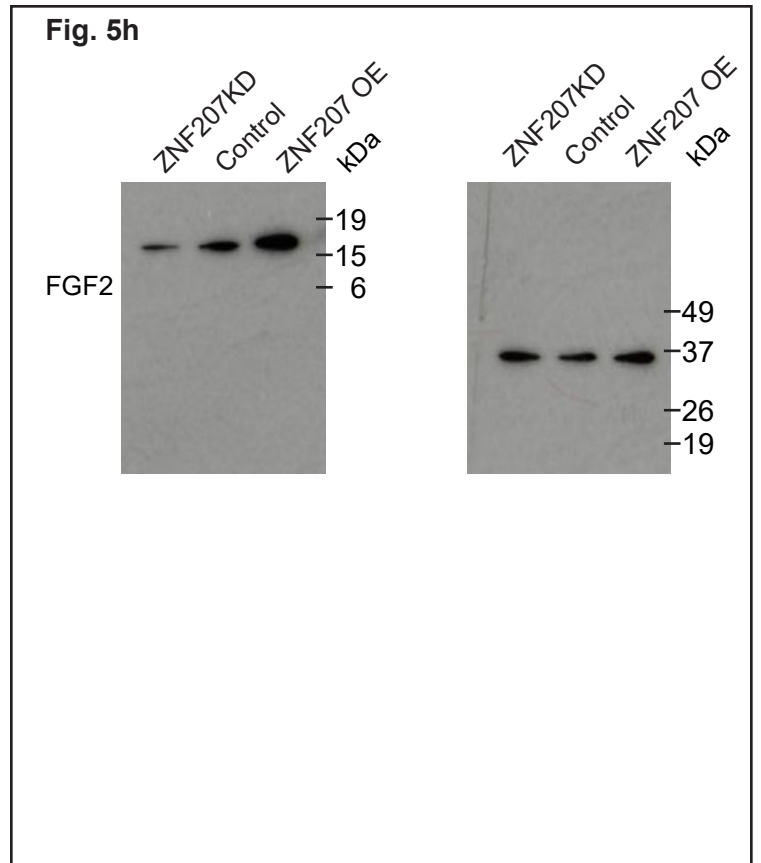

**Supplementary Fig. 1**

**d**

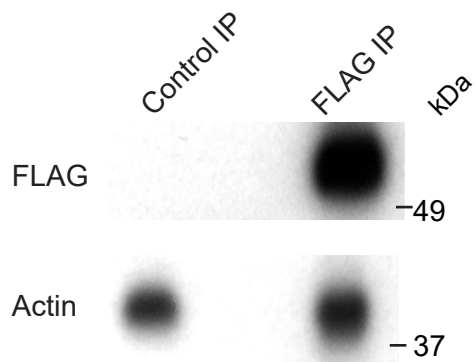

**e**

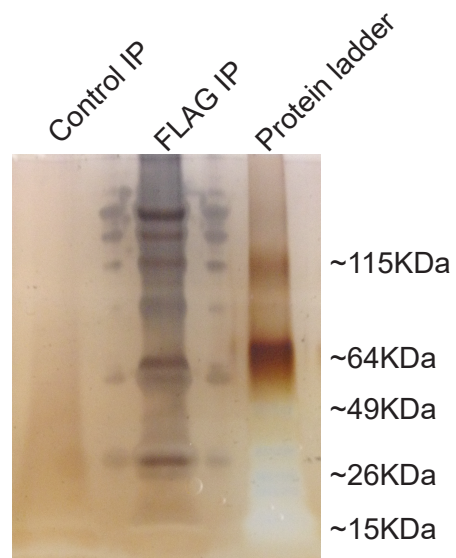

**Supplementary Fig. 2c**

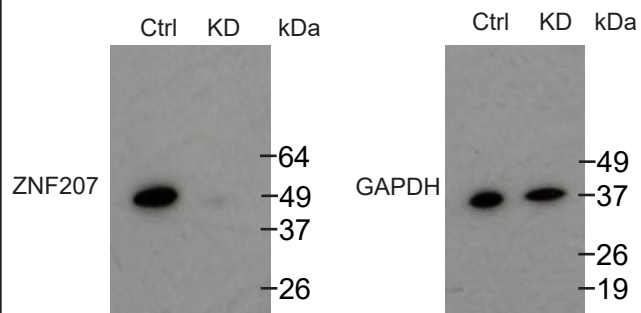

**Supplementary Table 1. Sequence and efficiency of Talen constructs targeting the proximal enhancer of *OCT4***

|                       | Genomic Sequence                                                  | Talen RVD Sequence                                          | Efficiency |
|-----------------------|-------------------------------------------------------------------|-------------------------------------------------------------|------------|
| Talen targeted site 1 | TCCCCAGAGGGGGCAGCT<br>ctaaccctaacaagtgctc<br>AACCCCTGAATGGGCCTGGA | HD HD HD HD NI NN NI NN NN NN<br>NN NN HD NI NN HD NG       | 6%         |
|                       |                                                                   | HD HD NI NN NN HD HD HD NI NG<br>NG HD NI NI NN NN NN NG NG |            |
| Talen targeted site 2 | TGGCTCCCCTGGGGACTGCT<br>tcctgctccccaaccccc<br>AGTCCCAATCCCCTCACA  | NN NN HD NG HD HD HD HD NG<br>NN NN NN NN NI HD NG NN HD NG | 1%         |
|                       |                                                                   | NN NG NN NI NN NN NN NN NI NG<br>NG NN NN NN NI HD NG       |            |
| Talen targeted site 3 | TCCCCTGGGGACTGCTT<br>cctgctccccaaccccc<br>AGTCCCAATCCCCTCACA      | HD HD HD HD NG NN NN NN NN NI<br>HD NG NN HD NG NG          | 5%         |
|                       |                                                                   | NN NG NN NI NN NN NN NN NI NG<br>NG NN NN NN NI HD NG       |            |
| Talen targeted site 4 | TGGGGACTGCTTCCTGCT<br>ccccaacccccagtccc<br>AATCCCCTCACACAGA       | NN HD NG HD HD HD HD NI NI HD<br>HD HD HD HD HD NI NN NG    | 12%        |
|                       |                                                                   | HD NG HD NG NN NI NI NN NN NN<br>NN NI NG NG HD NG          |            |

**Supplementary Table 2. Summary of immunoprecipitated proteins with known binding to the proximal enhancer of OCT4 in hESCs**

| <b>Gene</b>   | <b>Description</b>                   | <b>Global FDR(False Discovery Rate)</b> |
|---------------|--------------------------------------|-----------------------------------------|
| <b>POU5F1</b> | POU class 5 homeobox1                | <0.1%                                   |
| <b>SOX2</b>   | SRY (sex determining region Y)-box 2 | <0.1%                                   |
| <b>SALL4</b>  | Sal-like 4 (Drosophila)              | <0.1%                                   |
| <b>HDAC2</b>  | Histone deacetylase 2                | <0.1%                                   |
| <b>BRD4</b>   | Bromodomain containing 4             | <0.1%                                   |
| <b>CTBP2</b>  | C-terminal binding protein 2         | <0.1%                                   |

**Supplementary Table 3. Summary of the selected proteins for ChIP study**

| <b>Gene</b>    | <b>Description</b>                                                                                | <b>Global FDR</b> |
|----------------|---------------------------------------------------------------------------------------------------|-------------------|
| <b>CBX</b>     | Chromobox homolog 3                                                                               | <0.1%             |
| <b>HMGN1</b>   | High mobility group nucleosome binding domain 1                                                   | <0.1%             |
| <b>LIN28A</b>  | Lin-28 homolog A (C. elegans)                                                                     | <0.1%             |
| <b>MBD3</b>    | Methyl-CpG binding domain protein 3                                                               | <0.1%             |
| <b>POU6F1</b>  | POU class 6 homeobox 1                                                                            | <0.1%             |
| <b>SALL2</b>   | Sal-like 2 (Drosophila)                                                                           | <0.1%             |
| <b>SMARCC1</b> | SWI/SNF related, matrix associated, actin dependent regulator of chromatin, subfamily c, member 1 | <0.1%             |
| <b>ZNF207</b>  | Zinc finger protein 207                                                                           | <0.1%             |
| <b>ZNF706</b>  | Zinc finger protein 706                                                                           | <0.1%             |

**Supplementary Table 4. DNA Sequence of codon-optimized ZNF207 overexpression construct**

CACCATGGGCAGGAAGAAGAAGAAGCAGCTCAAGCCCTGGTGTGGTACTGTAACCGAGATTTTCGATGAC  
GAGAAAATTTTGATCCAGCATCAGAAGGCAAAGCACTTTAAGTGCCATATCTGCCACAAGAAGCTCTATA  
CAGGCCCTGGCCTCGCCATCCATTGCATGCAGGTGCACAAAGAGACTATCGATGCAGTACCTAATGCCAT  
CCCCGGCCGAACAGACATTGAGCTGGAGATCTATGGTATGGAAGGAATACCTGAAAAAGACATGGACGAG  
AGAAGACGCCTTTTGGAACAAAAACACAGGAGTCTCAAAAGAAGAAACAGCAGGATGACTCCGATGAAT  
ACGATGATGATGATTGAGCAGCTTCAACAAGCTTCCAGCCTCAGCCGGTACAGCCCCAACAGGGATATAT  
TCCTCCAATGGCCCAGCCTGGACTTCCACCGGTTCCCGGAGCACCAGGGATGCCTCCAGGGATTCCACCT  
CTGATGCCAGGAGTGCCTCCTCTCATGCCCGGTATGCCACCAGTGATGCCAGGCATGCCCCCAGGACTCC  
ATCACCAGCGAAATACACCCAATCTTTTTGTGGGGAGAATATTATGATGCCCATGGGAGGAATGATGCC  
ACCTGGACCCGGGATTCCACCCCTGATGCCAGGCATGCCCCCGGTATGCCACCCCCCGTGCCCCGCCCA  
GGGATCCCTCCTATGACTCAAGCCCAGGCGGTGTCTGCCCCCGGCATCCTGAACCGCCCACCAGCCCCAA  
CTGCAACTGTGCCCGCCCCCAGCCCCCTGTTACCAAGCCGCTCTTTCCCTTCTGCCGGCCAGATGGGAAC  
TCCCGTAACATCCTCCAGCACCGCCTCAAGCAATAGTGAGTCTCTGTCCGCCAGTTCTAAGGCTCTCTTT  
CCAAGTACCGCGCAGGCGCAGGCCGCAGTTCAGGGACCCGTGGGGACCGATTTTAAGCCCCTGAACTCCA  
CCCCGCTACTACTACTGAGCCTCCTAAGCCTACCTTCCCTGCATACACGCAGTCCACAGCTTCTACCAC  
TAGCACCAAACTCTACCGCCGCAAAGCCTGCCGCATCTATAACCTCCAAACCCGCCACTCTGACCACC  
ACTAGTGCCACTAGTAAACTCATTACCCAGACGAGGACATCAGCCTCGAGGAGAGACGAGCCCAGCTTC  
CTAAATACCAACGGAATCTCCCTCGGCCTGGTCAGGCCCCGATTGGGAATCCACCTGTGGGACCCATTGG  
TGGTATGATGCCCCCTCAGCCTGGGATTCCACAGCAACAAGGCATGCGGCCGCAATGCCGCCCCACGGT  
CAGTACGGCGGCCATCATCAAGGTATGCCAGGCTACCTCCCCGGCGCCATGCCCCCTACGGGCAGGGCC  
CCCCATGGTGCCTCCATACCAAGGAGGCCACCAGGCCCCCATGGGCATGCGGCCTCCGGTGATGTC  
CCAGGGGGGCAGATATGACTATAAGGACCACGATGGTGATTACAAGGATCACGATATTGATTACAAGGAT  
GACGACGACAAATGA

**Supplementary Table 5. Sequence of ChIP primers**

| Primers | Direction | Sequences            |
|---------|-----------|----------------------|
| 1       | Forward   | CCACTAGCCTTGACCTCTGG |
|         | Reverse   | CAGTCTGGGCAACAAAGTGA |
| 2       | Forward   | CTCCACACCTCCATGTTCT  |
|         | Reverse   | TGCCTAGGATTCTGGATGGA |
| 3       | Forward   | GGGACCAGACTTTGGACTGA |
|         | Reverse   | CCTCCCAGGCTTCTTTGAAC |
| 4       | Forward   | CTTCTCTGGGGACTCAG    |
|         | Reverse   | CAAGCACTAGACCAGCAGCA |
| 5       | Forward   | CGGTGGCTCATGCCTATAAT |
|         | Reverse   | TCGATCTCAGCTCACTGCAC |

**Supplementary Table 6. Sequence of siRNAs**

| Gene Name     | Direction | Sequences              | Accession #      | Targeted Exons |
|---------------|-----------|------------------------|------------------|----------------|
| <i>MBD3</i>   | sense     | CGGUGACCAAGAUUACCAAtt  | NM_003926        | 3              |
|               | Antisense | UUGGUAAUCUUGGUCACCGgc  |                  |                |
| <i>SALL2</i>  | sense     | CAGUGGAACCCAAGAAUAAtt  | NM_005407        | 2              |
|               | Antisense | UUAUUCUUGGGUUCACUGct   |                  |                |
| <i>LIN28A</i> | sense     | GAAGCGCAGAUCAAAGGAtt   | NM_024674        | 3              |
|               | Antisense | UCCUUUGAUCUGCGCUUctg   |                  |                |
| <i>POU6F1</i> | sense     | CCAAUUACCUUGCUCAGAGAtt | NM_002702        | ND             |
|               | Antisense | UCUCUGAGCAGGUAAUUGGga  |                  |                |
| <i>SOX2</i>   | sense     | CCGUUGGUAAUUUAUAUAgc   | NM_003106        | 1              |
|               | Antisense | UAUUUAAAAUUACCAACGGtg  |                  |                |
| <i>OCT4</i>   | sense     | GCAAAGCAGAAACCCUCGUgc  | NM_0011735<br>31 | 3,4            |
|               | Antisense | ACGAGGGUUUCUGCUUUGCat  |                  |                |

**Supplementary Table 7. Sequence for siRNA targeting *ZNF207***

| Assay ID | Sequences           | Interrogated Sequence | Targeted Exons | SiRNA Location |
|----------|---------------------|-----------------------|----------------|----------------|
| S15278   | GAUGAAAGACGACGACUUC | NM_001032293.2        | 9              | 1178           |
| S15279   | CAAUAGUACUGCAGCUAA  | NM_001032293.2        | 3              | 437            |
| S15280   | CAUCAAGGCAUGCCAGGAU | NM_001032293.2        | 9              | 1090           |



**Supplementary Table 8. Sequence of qPCR primers**

| Gene Name          | Direction | Sequences                 |
|--------------------|-----------|---------------------------|
| MBD3               | Forward   | GGCCACAGGGATGTCTTTTAC     |
|                    | Reverse   | GGCTCTTGTTTCATCTTGCTC     |
| SALL2              | Forward   | AGTTAATCTCGGACTGCGAAG     |
|                    | Reverse   | GAGGGTCAGTAGAACATGCG      |
| LIN28A             | Forward   | CATGCAGAAGCGCAGATCAA      |
|                    | Reverse   | GGTGGCAGCTTGCATTCC        |
| ZNF207             | Forward   | CCAGTCATTTTGCGGTGAAAAC    |
|                    | Reverse   | TGTGCTTGAGTCATTGGAGG      |
| ZNF207<br>-iso a   | Forward   | GCATCATCAGAGAAAATACACCCAG |
|                    | Reverse   | CATACCTGGTGGCATTCCAG      |
| ZNF207<br>-iso b   | Forward   | GGACACCTGTCACAAGCTC       |
|                    | Reverse   | AACAGGTCCTTGGACAGCTG      |
| ZNF207<br>-iso c-1 | Forward   | GAATGCCACCAGTTATGCCAG     |
|                    | Reverse   | AACAGGTCCTTGGACAGCTG      |
| ZNF207<br>-iso c-2 | Forward   | CATACCTGGTGGCATTCCAG      |
|                    | Reverse   | AACAGGTCCTTGGACAGCTG      |
| POU6F1             | Forward   | CTACAGCCAGTCAGCCATC       |
|                    | Reverse   | CCTCCCACAAACTCCATCAG      |
| SOX2               | Forward   | CATGAAGGAGCACCCGGATTA     |
|                    | Reverse   | CGGGCAGCGTGTACTTATCC      |
| OCT4               | Forward   | GGGACCAGTGTCTTTCC         |
|                    | Reverse   | GGGAAAGGGACCGAGGAGTA      |
| GAPDH              | Forward   | ACACCATGGGGAAGGTGAAG      |
|                    | Reverse   | GTGACCAGGCGCCCAATA        |
| GUSB               | Forward   | CATCGATGACATCACCGTCAC     |
|                    | Reverse   | ACAGGTTACTGCCCTTGACA      |

**Supplementary Table 9. Antibodies used in this study**

| <b>Primary/Secondary antibodies</b> | <b>Dilution</b>                                                       | <b>Company</b>                 | <b>Catalog #</b> |
|-------------------------------------|-----------------------------------------------------------------------|--------------------------------|------------------|
| ZNF207                              | ChIP: 5µg for 750µl chromatin pellet                                  | Santa Cruz Biotechnology, Inc. | sc-271942        |
| ZNF207                              | Western:1:2,000<br>IF: 1:500                                          | Sigma                          | HPA017013        |
| OCT4                                | Western: 1:1,000<br>IF: 1:500<br>ChIP: 5µg for 750µl chromatin pellet | Santa Cruz Biotechnology, Inc. | sc-8628          |
| SOX2                                | Western: 1:1,000<br>IF: 1:200<br>IP: 1: 200                           | R&D Systems                    | MAB2018          |
| FLAG                                | Western: 1:1,000<br>IP: 1: 200                                        | Sigma                          | F7425            |
| IgG                                 | ChIP: 5µg for 750µl chromatin pellet                                  | Santa Cruz Biotechnology, Inc. | Sc-66931         |
| β-ACTIN                             | Western: 1:1,000                                                      | Cell Signaling                 | 3700S            |
| GAPDH                               | Western: 1:1,000                                                      | Proteintech                    | 60004-1-Ig       |
| FGF2                                | Western: 1:1,000                                                      | Santa Cruz Biotechnology, Inc. | sc-79            |
| NANOG                               | IF:1:200                                                              | Cell Signaling                 | #5232            |
| TRA1-60                             | IF:1:200                                                              | Millipore                      | MAB4346          |
| SOX17                               | IF:1:200                                                              | R&D Systems                    | AF1924           |
| FOXA2                               | IF:1:500                                                              | Santa Cruz Biotechnology, Inc. | sc374375         |
| NES                                 | IF:1:500                                                              | Sigma                          | HPA026111        |
| NCAM                                | IF:1:200                                                              | Stem Cell Technology           | 60021AD          |
| OTX2                                | IF:1:500                                                              | R&D Systems                    | AF1979           |
| α-TUBULIN                           | IF:1:500                                                              | Sigma                          | T9026            |
| CREST                               | IF:1:500                                                              | Antibodies Incorporated        | 15-235           |
| P55                                 | IF:1:200                                                              | Santa Cruz Biotechnology, Inc. | Sc-13162         |
| CBX                                 | ChIP: 5µg for 750µl chromatin pellet                                  | EMD Millipore                  | 05-690           |
| HMGN1                               | ChIP: 5µg for 750µl chromatin pellet                                  | Bethyl Laboratories, Inc.      | A302-363A        |
| LIN28A                              | ChIP: 5µg for 750µl chromatin pellet                                  | Proteintech                    | 11724-1-AP       |
| MBD3                                | ChIP: 5µg for 750µl chromatin pellet                                  | Bethyl Laboratories, Inc.      | A302-528A        |

|                        |                                      |                                |               |
|------------------------|--------------------------------------|--------------------------------|---------------|
|                        |                                      |                                |               |
| POU6F1                 | ChIP: 5µg for 750µl chromatin pellet | Novus Biologicals              | H00005463-D01 |
| SALL2                  | ChIP: 5µg for 750µl chromatin pellet | Bethyl Laboratories, Inc.      | A303-208A     |
| SMARCC1                | ChIP: 5µg for 750µl chromatin pellet | Cell Signaling Technology      | 11956S        |
| ZNF706                 | ChIP: 5µg for 750µl chromatin pellet | Santa Cruz Biotechnology, Inc. | Sc-87771      |
| 488 Donkey Anti-Goat   | IF:1:250                             | Jackson ImmunoResearch         | 705-545-147   |
| 594 Donkey Anti-Goat   | IF:1:250                             | Jackson ImmunoResearch         | 705-585-147   |
| 488 Donkey Anti-Rabbit | IF:1:250                             | Jackson ImmunoResearch         | 711-545-152   |
| 594 Donkey Anti-Rabbit | IF:1:250                             | Jackson ImmunoResearch         | 711-585-152   |
| 488 Donkey Anti-Mouse  | IF:1:250                             | Jackson ImmunoResearch         | 715-545-150   |
| 594 Donkey Anti-Mouse  | IF:1:250                             | Jackson ImmunoResearch         | 715-585-150   |
