# Supplementary material for: A distinct isoform of ZNF207 controls self-renewal and pluripotency of human embryonic stem cells
Source: PubMed Central journal article supplement (PMC6197280; doi:10.1038/s41467-018-06908-5), 2018-10-22
Supplement: 41467_2018_6908_MOESM3_ESM.pdf [file 41467_2018_6908_MOESM3_ESM.pdf]

**Supplementary Data file: Nuclear proteins identified by proteomics**
